# Supplementary material for: Development and Validation of an Insulin Resistance Model for a Population with Chronic Kidney Disease Using a Machine Learning Approach
Source: MDPI journal article supplement (doi:10.3390/nu14142832), 2022-07-09

# Supplementary data

Table S1. All baseline characteristics according to train, test and validation group.

|                                               | Overall                  | Train                    | Validation              | Test                     | p-value |
|-----------------------------------------------|--------------------------|--------------------------|-------------------------|--------------------------|---------|
| <b>Case number, n</b>                         | <b>1229</b>              | <b>675</b>               | <b>185</b>              | <b>369</b>               |         |
| <b>HOMA_IR</b>                                | 4.73(4.21-5.25)          | 4.74(4.07-5.41)          | 5.15(3.73-6.56)         | 4.52(3.67-5.37)          | <.0001  |
| <b>Age (y/o)</b>                              | 71.51(70.7-72.33)        | 71.54(70.49-72.59)       | 71.97(70.38-73.55)      | 71.25(69.69-72.81)       | <.0001  |
| <b>Male, n (%)</b>                            | 573(40.99)               | 320(41.83)               | 95(44.4)                | 158(37.85)               | 0.3543  |
| <b>Ethnicity, n (%)</b>                       |                          |                          |                         |                          |         |
| <b>Non-Hispanic white</b>                     | 824(82.62)               | 438(80.78)               | 128(84.09)              | 258(85.17)               | 0.2082  |
| <b>Non-Hispanic black</b>                     | 214(9.24)                | 125(9.75)                | 30(9.36)                | 59(8.29)                 |         |
| <b>Mexican American/others</b>                | 191(8.13)                | 112(9.47)                | 27(6.55)                | 52(6.54)                 |         |
| <b>Body Mass Index (kg/m<sup>2</sup>)</b>     | 29.04(28.61-29.47)       | 29(28.35-29.65)          | 29.72(28.43-31)         | 28.79(28.01-29.57)       | <.0001  |
| <b>Laboratory data</b>                        |                          |                          |                         |                          |         |
| <b>Glycohemoglobin (%)</b>                    | 5.96(5.88-6.03)          | 5.92(5.84-6.01)          | 6.08(5.87-6.3)          | 5.95(5.84-6.07)          | <.0001  |
| <b>Fasting plasma glucose (mg/dl)</b>         | 109.75(107.05-112.46)    | 108.99(105.87-112.1)     | 113.82(103.49-124.16)   | 109.12(105.09-113.16)    | <.0001  |
| <b>HDL-cholesterol (mg/dL)</b>                | 53.06(52.06-54.06)       | 53.25(51.81-54.7)        | 53.83(51.52-56.14)      | 52.35(50.2-54.51)        | <.0001  |
| <b>Total cholesterol (mg/dL)</b>              | 193.47(190.44-196.51)    | 193.71(190.3-197.12)     | 196.91(187.7-206.11)    | 191.38(185.16-197.6)     | <.0001  |
| <b>Triglycerides (mg/dL)</b>                  | 149.91(143.58-156.24)    | 149.13(139.2-159.07)     | 151.77(136.86-166.67)   | 150.38(138.77-161.98)    | <.0001  |
| <b>Daily food intake</b>                      |                          |                          |                         |                          |         |
| <b>Daily protein intake (gm)/kg</b>           | 0.85(0.82-0.89)          | 0.85(0.81-0.89)          | 0.86(0.79-0.92)         | 0.86(0.8-0.91)           | <.0001  |
| <b>Daily energy intake (kcal)/kg</b>          | 21.82(21.19-22.46)       | 22.02(21.1-22.94)        | 21.39(19.94-22.84)      | 21.68(20.38-22.97)       | <.0001  |
| <b>Daily protein intake ratio (%)</b>         | 16.06(15.62-16.49)       | 15.82(15.24-16.41)       | 16.7(15.88-17.52)       | 16.15(15.49-16.82)       | <.0001  |
| <b>Daily carbohydrate intake ratio (%)</b>    | 50.15(49.29-51.01)       | 50.24(49.51-49)          | 49.19(47.86-50.52)      | 50.45(49.16-51.73)       | <.0001  |
| <b>Daily total fat intake ratio (%)</b>       | 33.8(33.18-34.41)        | 33.93(33.01-34.85)       | 34.11(32.76-35.47)      | 33.4(32.37-34.43)        | <.0001  |
| <b>Daily fiber intake (gm)</b>                | 13.82(13.22-14.42)       | 13.56(12.84-14.28)       | 14.6(12.96-16.24)       | 13.9(12.7-15.09)         | <.0001  |
| <b>Daily cholesterol intake (mg)</b>          | 241.11(227.22-255)       | 253.91(230.81-277.01)    | 230.45(208.21-252.68)   | 223.66(200.49-246.82)    | <.0001  |
| <b>Total Folate (mcg)</b>                     | 340.79(328.33-353.26)    | 335.77(318.32-353.22)    | 375.69(338.37-413.01)   | 332.65(312.63-352.68)    | <.0001  |
| <b>Total saturated fatty acids (gm)</b>       | 20.98(20.15-21.81)       | 21.22(20.01-22.44)       | 21.39(19.42-23.35)      | 20.34(18.77-21.92)       | <.0001  |
| <b>Total monounsaturated fatty acids (gm)</b> | 23.2(22.27-24.12)        | 23.39(21.99-24.78)       | 22.94(21.1-24.78)       | 22.98(21.3-24.66)        | <.0001  |
| <b>Total polyunsaturated fatty acids (gm)</b> | 13.92(13.36-14.49)       | 14.08(13.21-14.95)       | 13.22(12.03-14.41)      | 14(12.82-15.17)          | <.0001  |
| <b>Vitamin B6 (mg)</b>                        | 1.69(1.62-1.76)          | 1.66(1.56-1.75)          | 1.83(1.63-2.02)         | 1.68(1.55-1.8)           | <.0001  |
| <b>Vitamin B12 (mcg)</b>                      | 4.66(4.34-4.98)          | 4.54(4.15-4.92)          | 5.33(4.61-6.04)         | 4.56(3.78-5.34)          | <.0001  |
| <b>Vitamin C (mg)</b>                         | 78.24(72.81-83.67)       | 77.44(69.78-85.09)       | 76.46(63.04-89.87)      | 80.52(72.29-88.76)       | <.0001  |
| <b>Calcium (mg)</b>                           | 760.8(731.17-790.44)     | 762.7(723.99-801.4)      | 810.63(722.34-898.93)   | 733.14(679.76-786.52)    | <.0001  |
| <b>Phosphorus (mg)</b>                        | 1083.49(1050.23-1116.74) | 1086.12(1042.32-1129.92) | 1108.97(1037.8-1180.14) | 1066.38(1002.84-1129.93) | <.0001  |
| <b>Magnesium (mg)</b>                         | 238.5(230.36-246.64)     | 237.12(227.04-247.21)    | 246.6(231.36-261.84)    | 236.99(221.06-252.92)    | <.0001  |

|                                      |                          |                          |                          |                          |        |
|--------------------------------------|--------------------------|--------------------------|--------------------------|--------------------------|--------|
| <b>Iron (mg)</b>                     | 13.57(13.03-14.1)        | 13.49(12.79-14.19)       | 14.97(13.47-16.47)       | 13.02(12.14-13.89)       | <.0001 |
| <b>Zinc (mg)</b>                     | 9.99(9.49-10.49)         | 9.74(9.17-10.32)         | 11.95(10.14-13.76)       | 9.48(8.8-10.15)          | <.0001 |
| <b>Copper (mg)</b>                   | 1.08(1.03-1.13)          | 1.05(1-1.09)             | 1.11(0.99-1.23)          | 1.12(1.01-1.24)          | <.0001 |
| <b>Sodium (mg)</b>                   | 2782.85(2687.8-2877.9)   | 2811.09(2675.21-2946.97) | 2756.21(2569.42-2943)    | 2745.85(2573.55-2918.15) | <.0001 |
| <b>Potassium (mg)</b>                | 2366.12(2298.49-2433.75) | 2331.67(2242.45-2420.89) | 2474.48(2315.69-2633.26) | 2374.24(2246.74-2501.74) | <.0001 |
| <b>Selenium (mcg)</b>                | 88.69(85.61-91.78)       | 89.13(84.83-93.44)       | 90.79(84.66-96.92)       | 86.9(81.36-92.44)        | <.0001 |
| <b>Caffeine (mg)</b>                 | 144.84(131.87-157.81)    | 148.43(134.74-162.12)    | 165.36(129.11-201.61)    | 128.48(105.53-151.42)    | <.0001 |
| <b>Theobromine (mg)</b>              | 30.68(26.29-35.07)       | 30.8(24.45-37.15)        | 24.2(15.31-33.08)        | 33.62(26.2-41.04)        | <.0001 |
| <b>Alcohol (gm)</b>                  | 4.05(3.12-4.99)          | 4.62(3.26-5.99)          | 4.72(2.05-7.39)          | 2.73(1.54-3.91)          | <.0001 |
| <b>Smoking, n (%)</b>                | 606(49.67)               | 338(50.46)               | 86(46.59)                | 182(49.77)               | 0.6941 |
| <b>Cardiovascular disease, n (%)</b> | 188(16.48)               | 109(18.79)               | 35(19.34)                | 44(11.01)                | 0.0073 |
| <b>Hypertension, n (%)</b>           | 882(70.82)               | 484(70.76)               | 133(75.09)               | 265(68.86)               | 0.5049 |
| <b>Diabetes mellitus, n (%)</b>      | 425(30.81)               | 223(29.27)               | 67(35.81)                | 135(31.08)               | 0.3706 |
| <b>Case number, n</b>                | 572(44.51)               | 314(44.94)               | 86(44.2)                 | 172(43.9)                | 0.9625 |

Table S2. Unweighted data of descriptive statistics in all baseline characteristics according to insulin resistance (IR>3) or not (IR ≤3).

|                                        | Overall       | HOMA IR ≤ 3   | HOMA IR >3    | p-value |
|----------------------------------------|---------------|---------------|---------------|---------|
| <b>Epidemiology</b>                    |               |               |               |         |
| Case number, n                         | 1229          | 657           | 572           |         |
| HOMA-IR                                | 4.96±8.33     | 1.73±0.69     | 8.68±11.08    | <.0001  |
| Age (y/o)                              | 73.39±10.24   | 74.61±10.57   | 71.99±9.66    | <.0001  |
| Male, n (%)                            | 573(46.62)    | 290(44.14)    | 283(49.48)    | 0.0614  |
| Ethnicity, n (%)                       |               |               |               |         |
| Non-Hispanic white                     | 824(67.05)    | 475(72.3)     | 349(61.01)    | 0.0001  |
| Non-Hispanic black                     | 214(17.41)    | 95(14.46)     | 119(20.8)     |         |
| Mexican American/others                | 191(15.54)    | 87(13.24)     | 104(18.18)    |         |
| Body Mass Index (kg/m <sup>2</sup> )   | 28.97±6.39    | 26.65±5.04    | 31.63±6.73    | <.0001  |
| <b>Laboratory data</b>                 |               |               |               |         |
| Glycohemoglobin (%)                    | 6.03±1.08     | 5.72±0.69     | 6.4±1.3       | <.0001  |
| Fasting plasma glucose (mg/dl)         | 112.16±38.5   | 98.27±18.69   | 128.11±48.07  | <.0001  |
| HDL-cholesterol (mg/dL)                | 52.83±16.5    | 56.83±17.11   | 48.25±14.5    | <.0001  |
| Total cholesterol (mg/dL)              | 192.24±47.81  | 195.96±49.92  | 187.96±44.92  | 0.0032  |
| Triglycerides (mg/dL)                  | 147.68±96.86  | 123.51±61.53  | 175.43±119.93 | <.0001  |
| <b>Daily food intake</b>               |               |               |               |         |
| <b>Macronutrients</b>                  |               |               |               |         |
| Daily energy intake (kcal)/kg          | 21.46±9.72    | 23.24±10.35   | 19.41±8.5     | <.0001  |
| Daily carbohydrate intake ratio (%)    | 50.36±10.07   | 51.7±9.6      | 48.82±10.38   | <.0001  |
| Daily protein intake (gm)/kg           | 0.84±0.43     | 0.88±0.44     | 0.79±0.41     | 0.0002  |
| Daily protein intake ratio (%)         | 16.07±5.16    | 15.62±5.08    | 16.58±5.21    | 0.0012  |
| Daily total fat intake ratio (%)       | 33.57±8.76    | 32.68±8.31    | 34.6±9.16     | 0.0001  |
| Total saturated fatty acids (gm)       | 20.11±12.15   | 19.52±12.06   | 20.79±12.22   | 0.0677  |
| Total monounsaturated fatty acids (gm) | 22.59±13.7    | 21.64±13.32   | 23.69±14.06   | 0.0089  |
| Total polyunsaturated fatty acids (gm) | 13.56±8.92    | 13.19±8.74    | 13.98±9.11    | 0.1214  |
| Daily cholesterol intake (mg)          | 242.82±194.27 | 223.16±188.75 | 265.39±198.2  | 0.0001  |
| <b>Micronutrients</b>                  |               |               |               |         |
| Daily fiber intake (gm)                | 13.74±7.81    | 13.93±7.9     | 13.52±7.69    | 0.3615  |
| Total Folate (mcg)                     | 331.9±187.91  | 336.98±186.77 | 326.07±189.22 | 0.3101  |
| Vitamin B6 (mg)                        | 1.63±1.05     | 1.65±1.03     | 1.61±1.06     | 0.5898  |
| Vitamin B12 (mcg)                      | 4.39±4.41     | 4.33±4.11     | 4.46±4.73     | 0.6021  |
| Vitamin C (mg)                         | 78.44±80.03   | 79.1±73.24    | 77.68±87.24   | 0.7589  |
| Calcium (mg)                           | 733.64±458.75 | 727.33±449.13 | 740.88±469.86 | 0.6056  |

|                               |                 |                 |                 |        |
|-------------------------------|-----------------|-----------------|-----------------|--------|
| Phosphorus (mg)               | 1054.18±481.47  | 1032.47±472.04  | 1079.1±491.3    | 0.0903 |
| Magnesium (mg)                | 233.4±112.58    | 233.71±111.51   | 233.05±113.9    | 0.9185 |
| Iron (mg)                     | 13.25±7.58      | 13.43±7.77      | 13.04±7.36      | 0.3733 |
| Zinc (mg)                     | 9.66±7.55       | 9.48±8.32       | 9.87±6.54       | 0.3564 |
| Copper (mg)                   | 1.06±0.71       | 1.05±0.64       | 1.08±0.79       | 0.4757 |
| Sodium (mg)                   | 2696.5±1340.68  | 2620.94±1283.36 | 2783.29±1399.72 | 0.0353 |
| Potassium (mg)                | 2291.13±1045.91 | 2282.81±1011.44 | 2300.69±1084.95 | 0.7652 |
| Selenium (mcg)                | 87.36±50.49     | 85.38±53.13     | 89.64±47.23     | 0.1369 |
| Caffeine (mg)                 | 126.8±150.51    | 125.43±143.56   | 128.36±158.22   | 0.7352 |
| Theobromine (mg)              | 29.39±62.27     | 30.47±65.05     | 28.16±58.96     | 0.514  |
| Alcohol (gm)                  | 3.66±13.34      | 4.35±13.86      | 2.87±12.67      | 0.0515 |
| Smoking, n (%)                | 606(49.31)      | 322(49.01)      | 284(49.65)      | 0.823  |
| Cardiovascular disease, n (%) | 188(15.3)       | 92(14)          | 96(16.78)       | 0.1768 |
| Hypertension, n (%)           | 882(72)         | 423(64.68)      | 459(80.39)      | <.0001 |
| Diabetes mellitus, n (%)      | 425(34.58)      | 126(19.18)      | 299(52.27)      | <.0001 |

Figure S1. SHAP values of all features from XGBoost algorithm

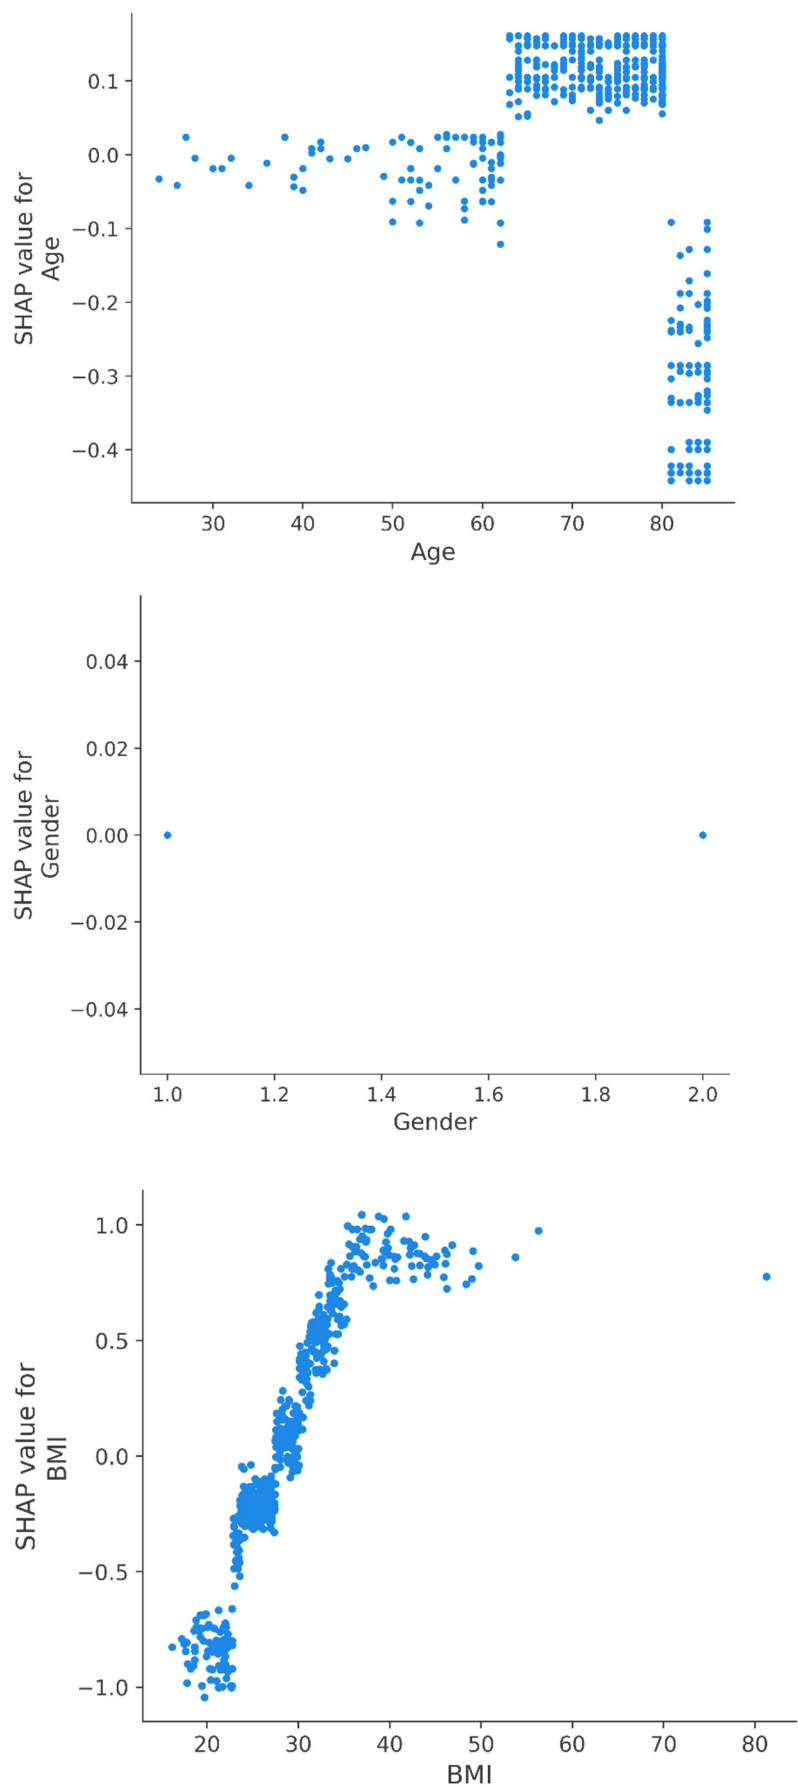

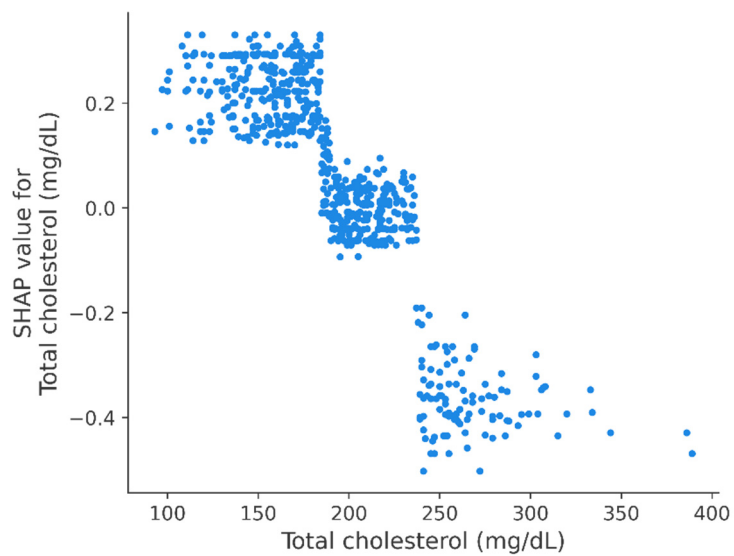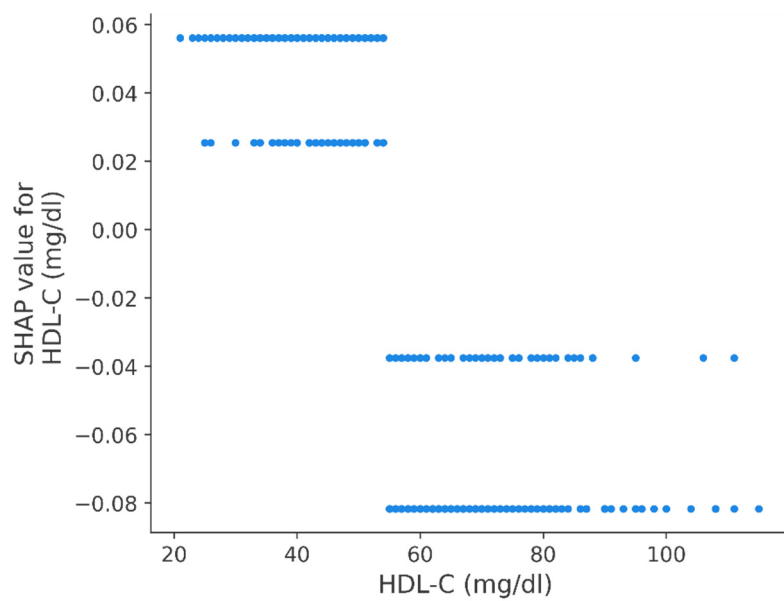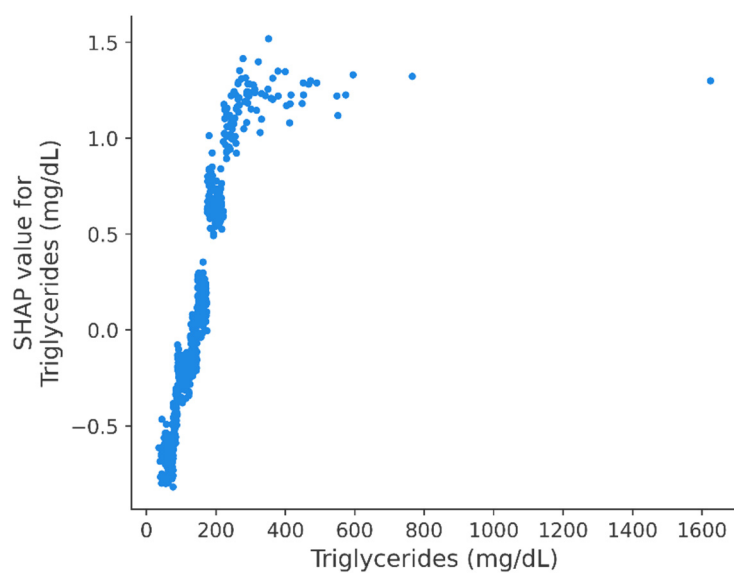

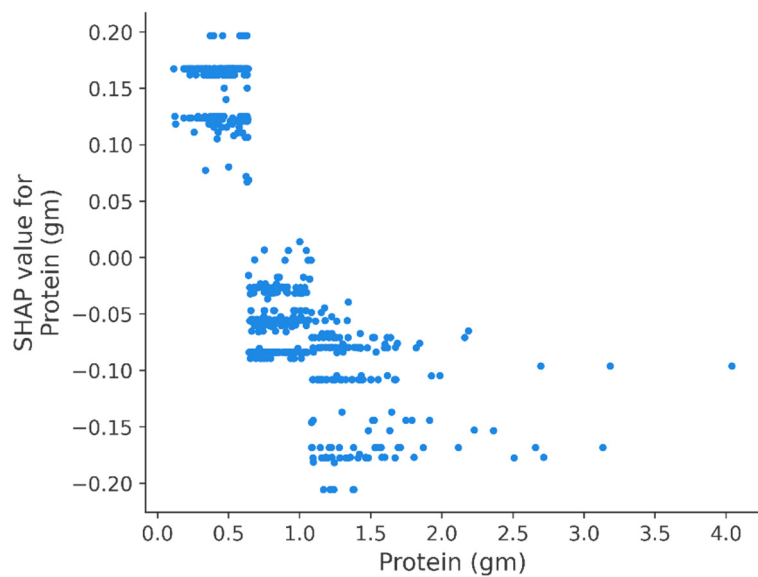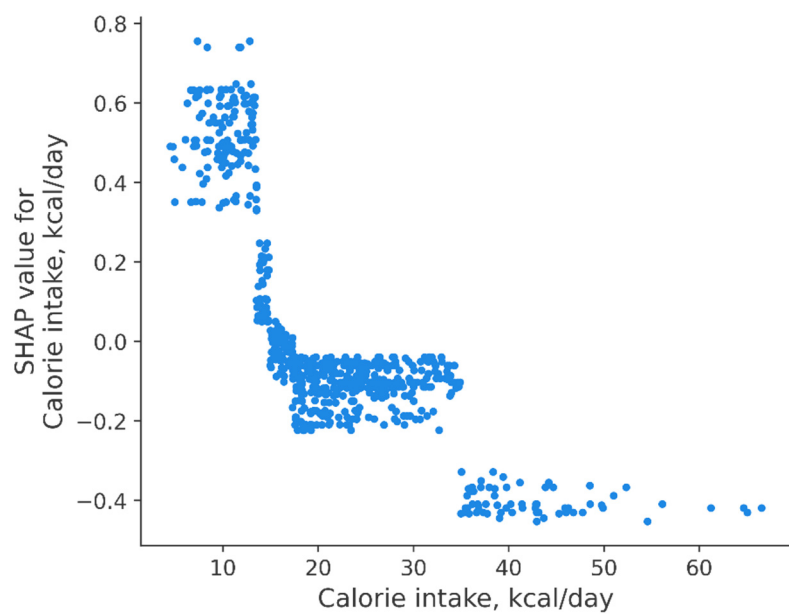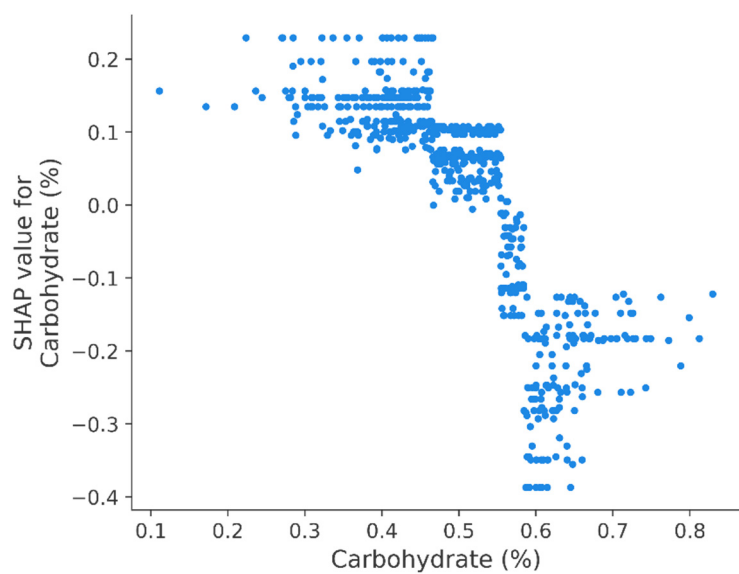

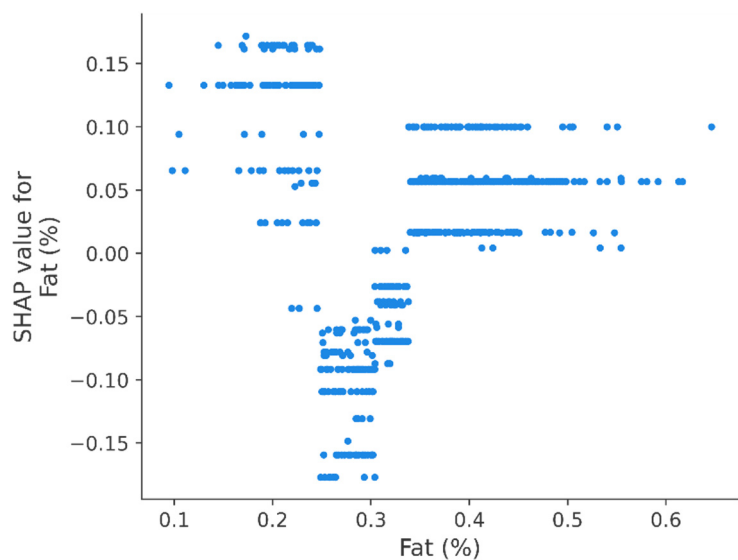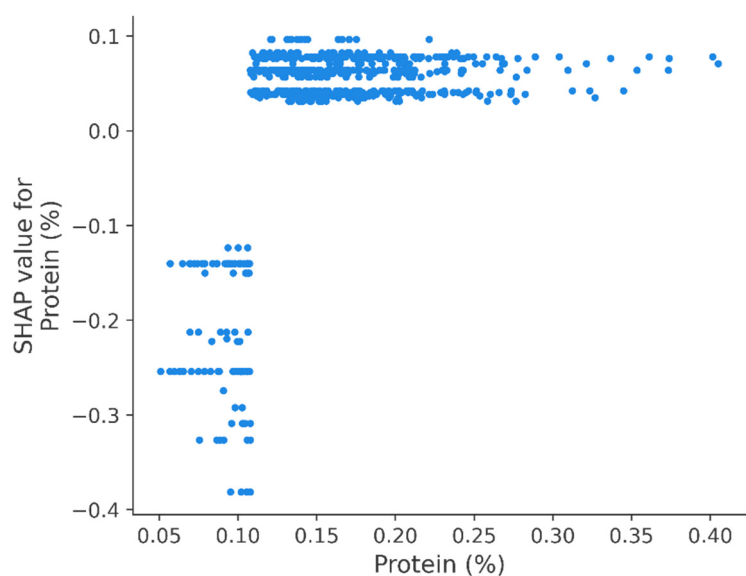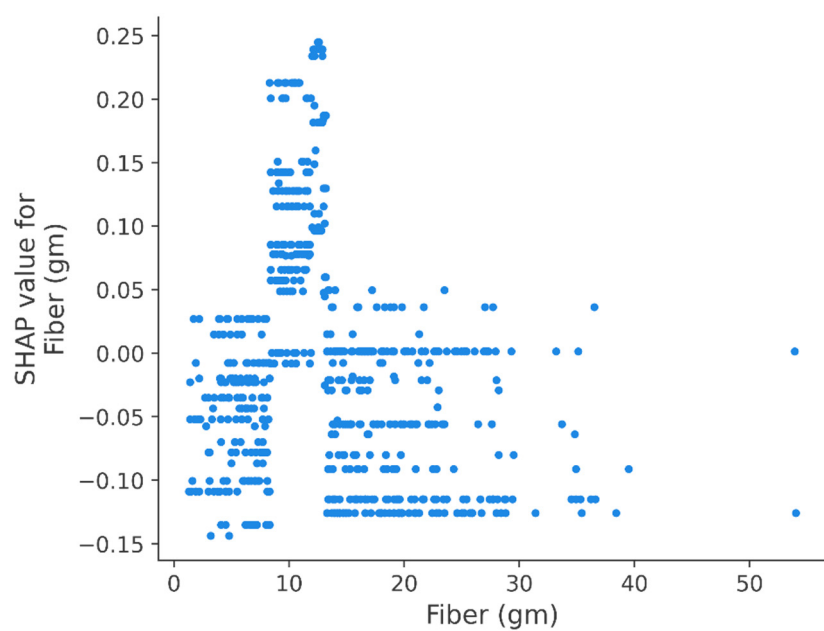



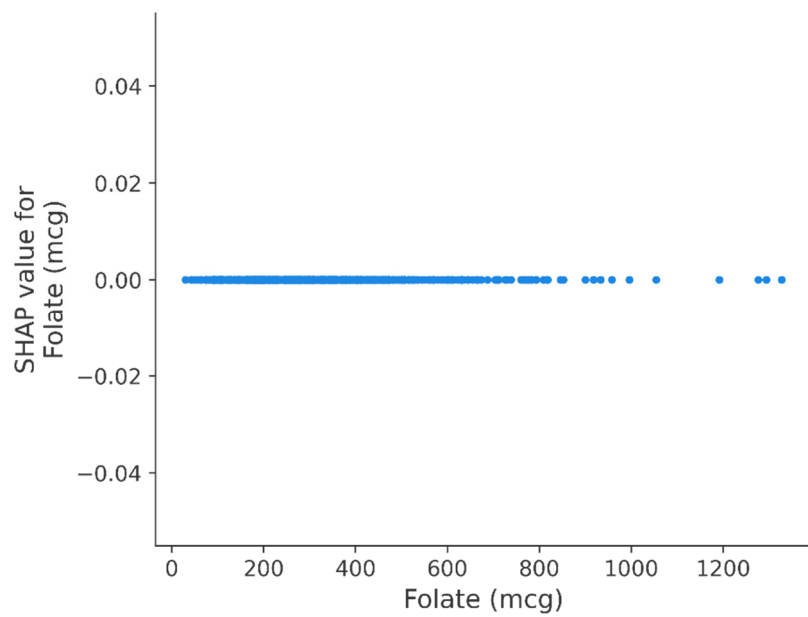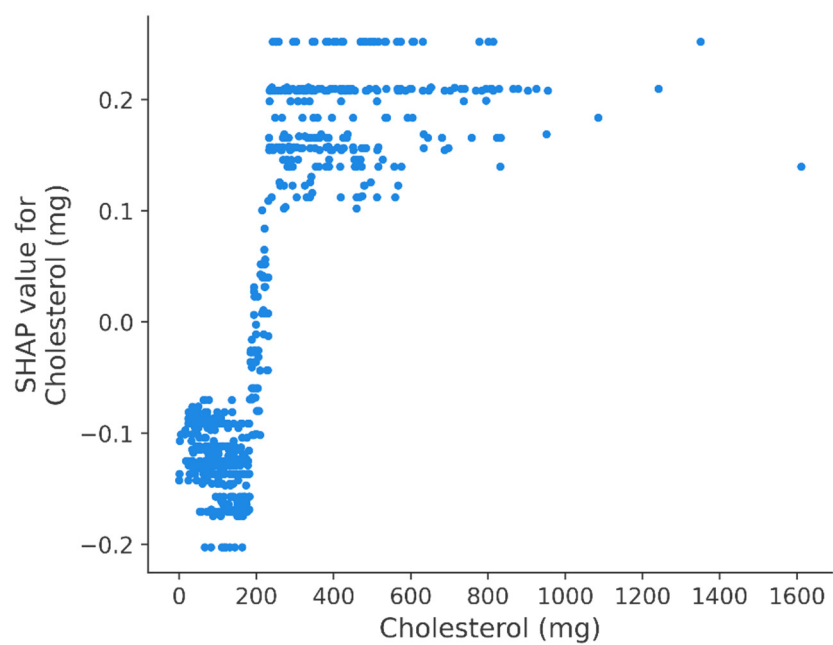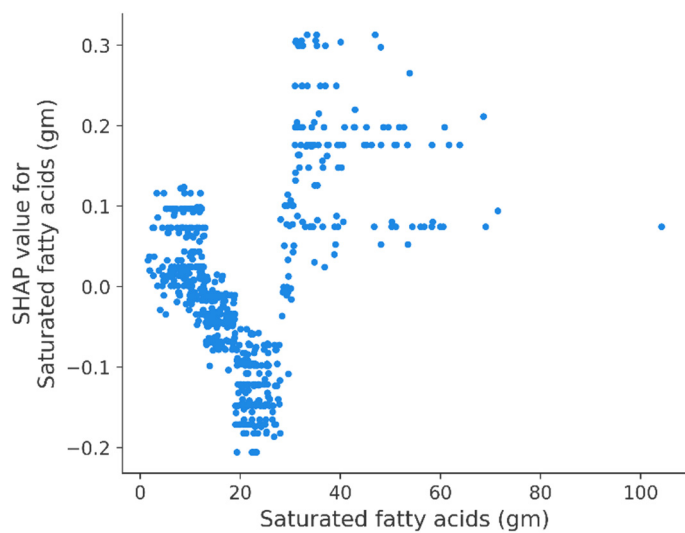

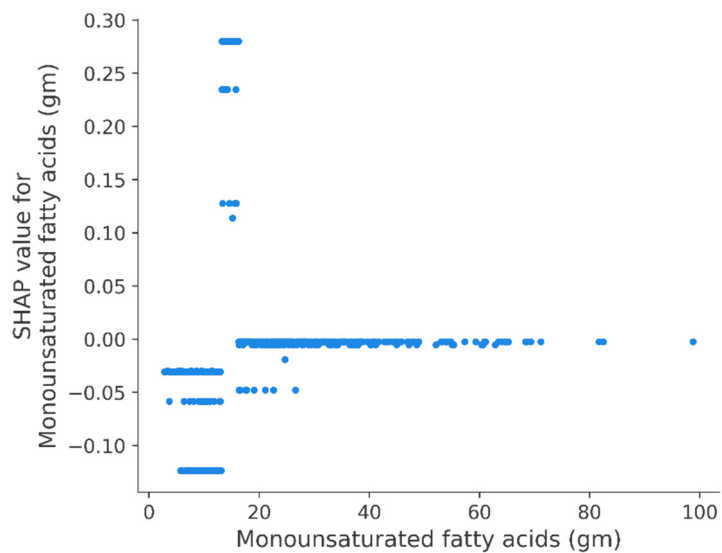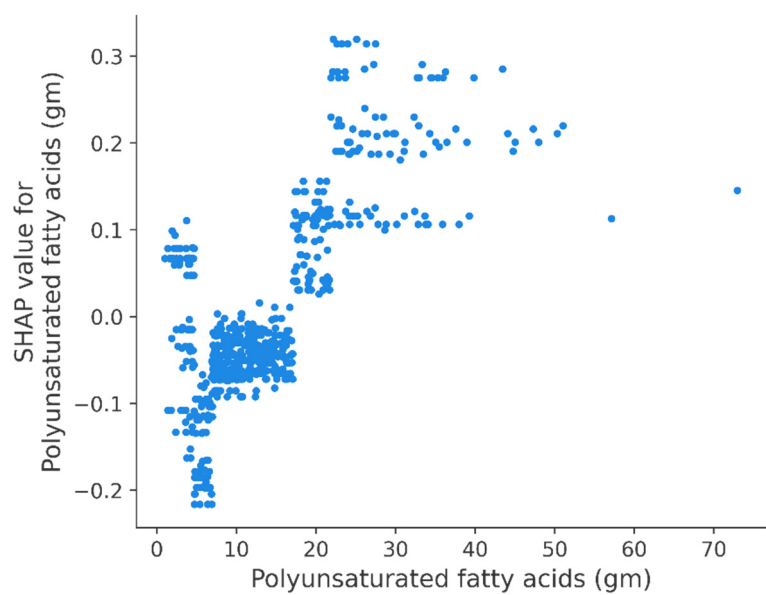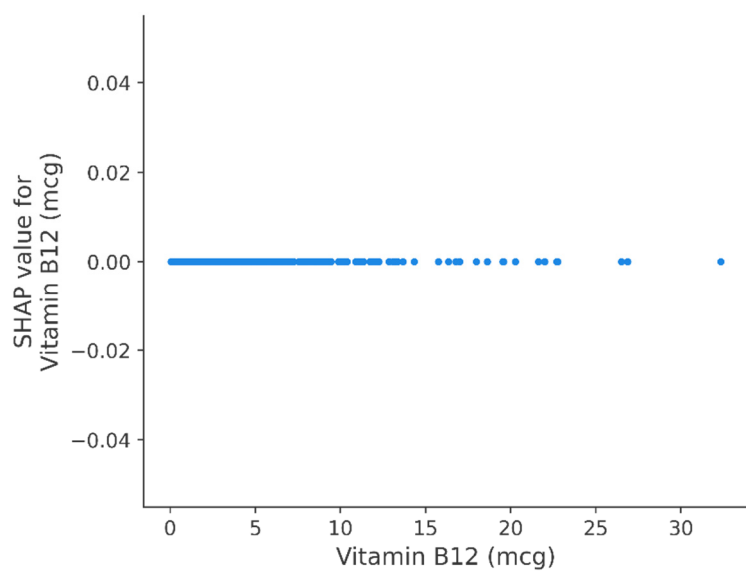

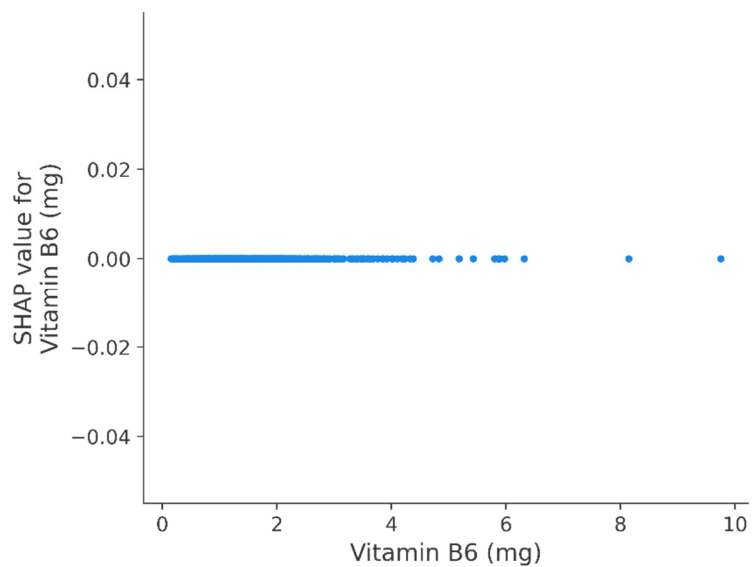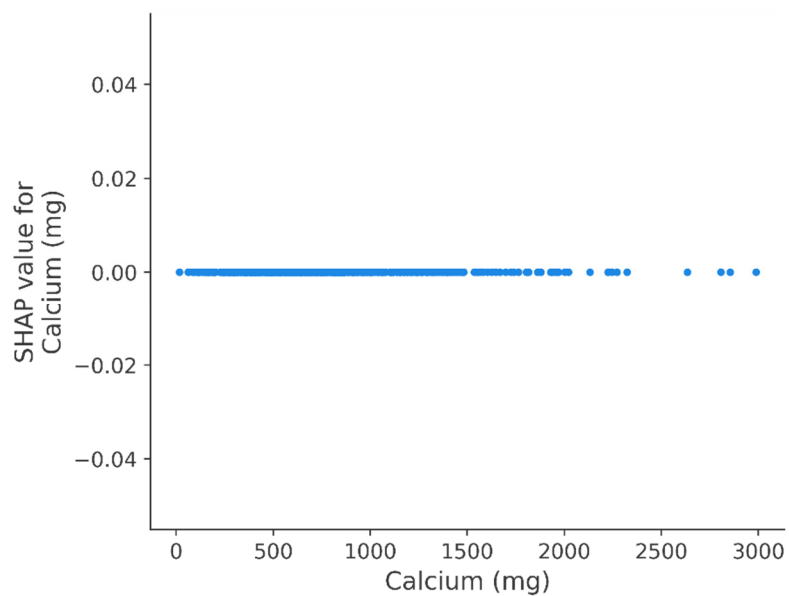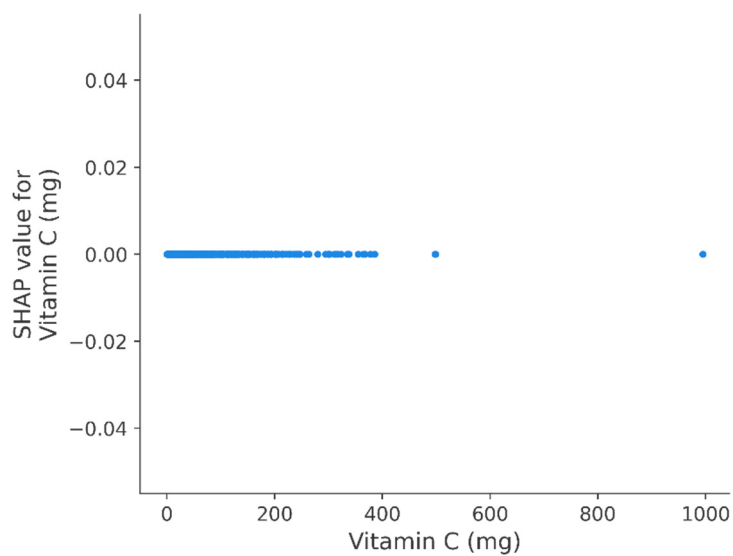

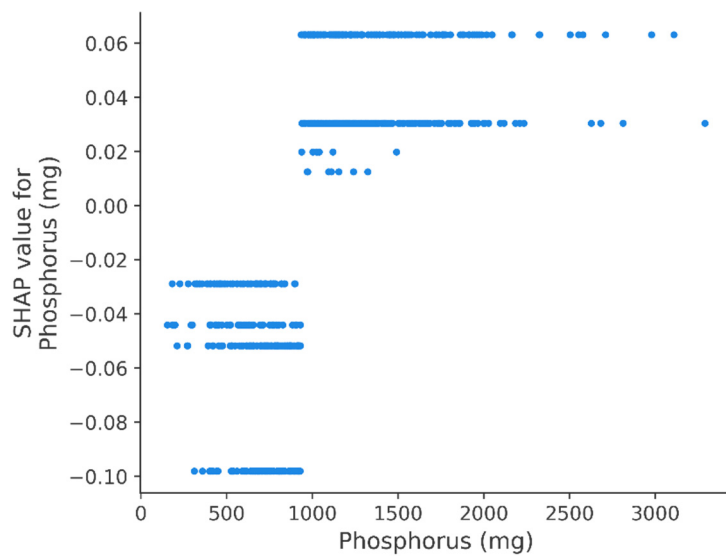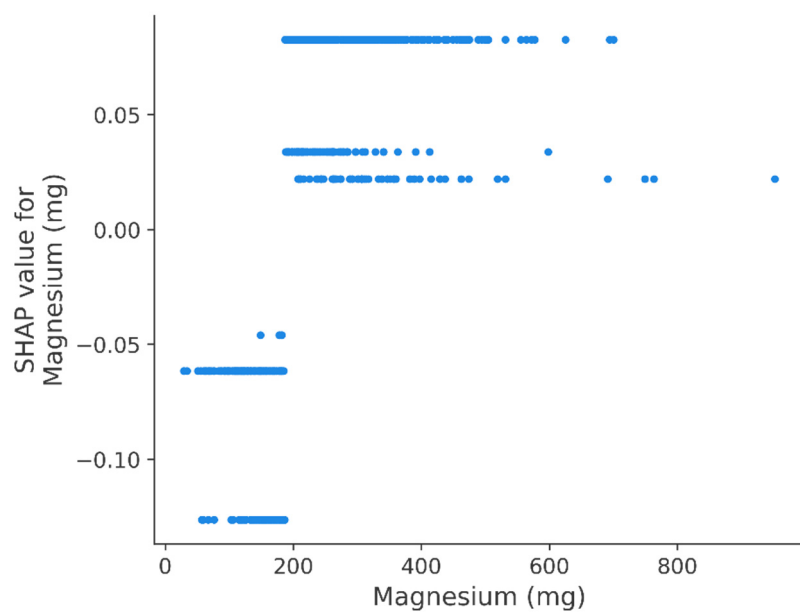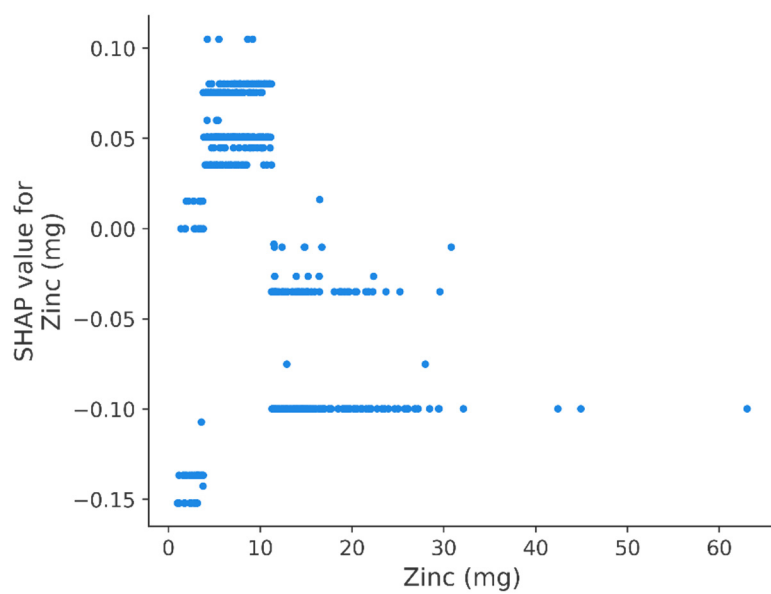

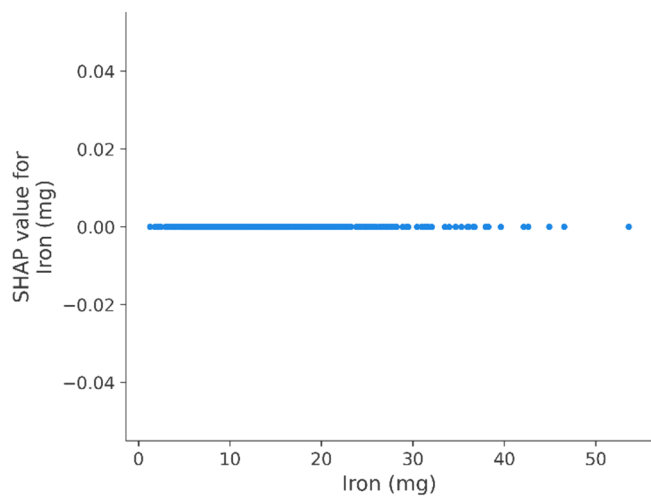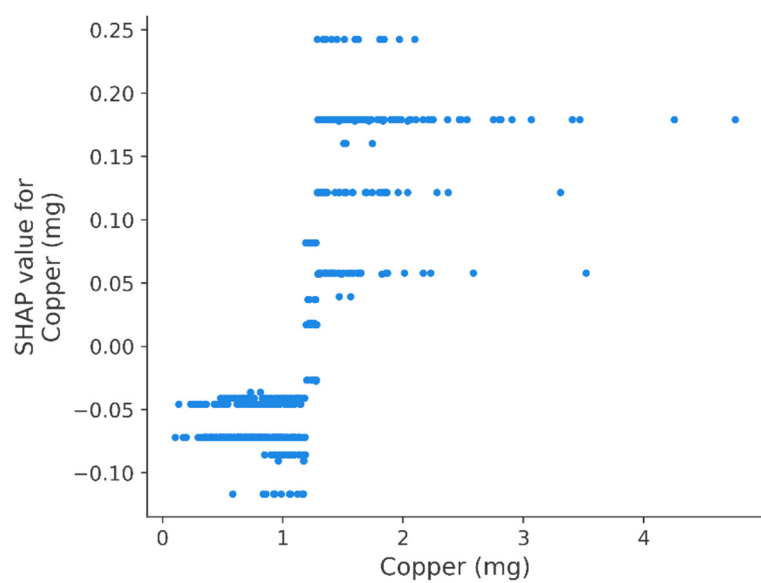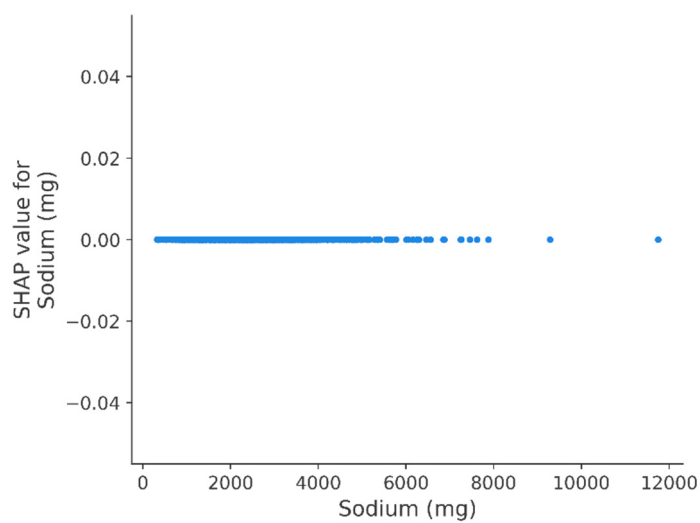

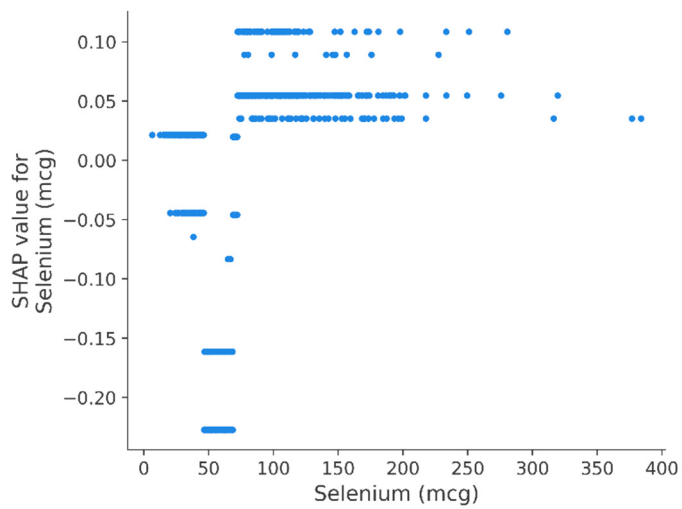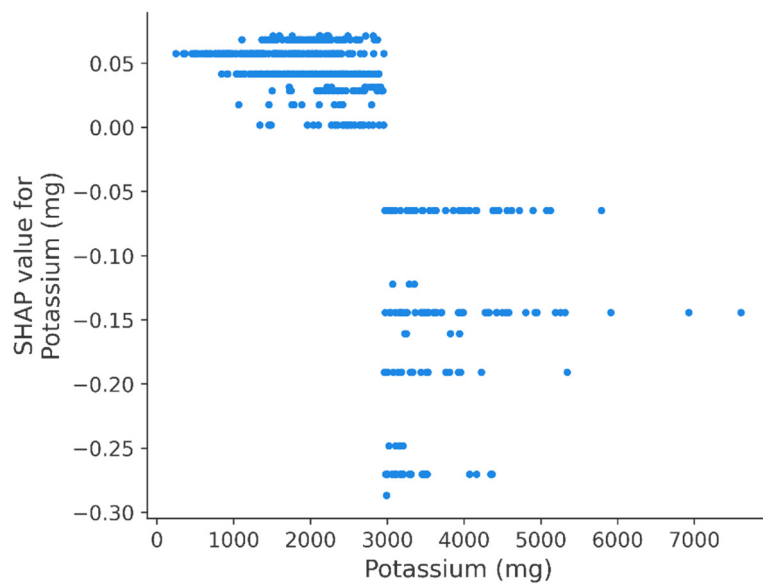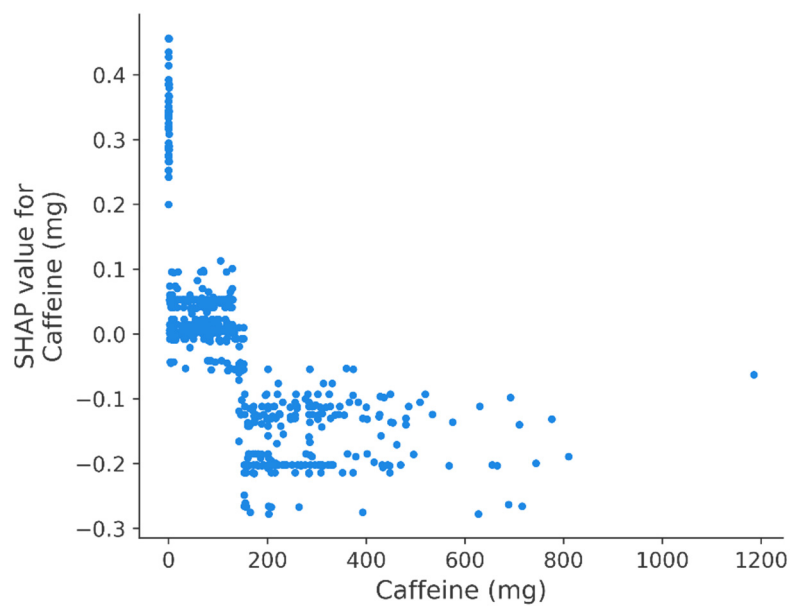



Figure S2. SHAP values of all features from RF algorithm

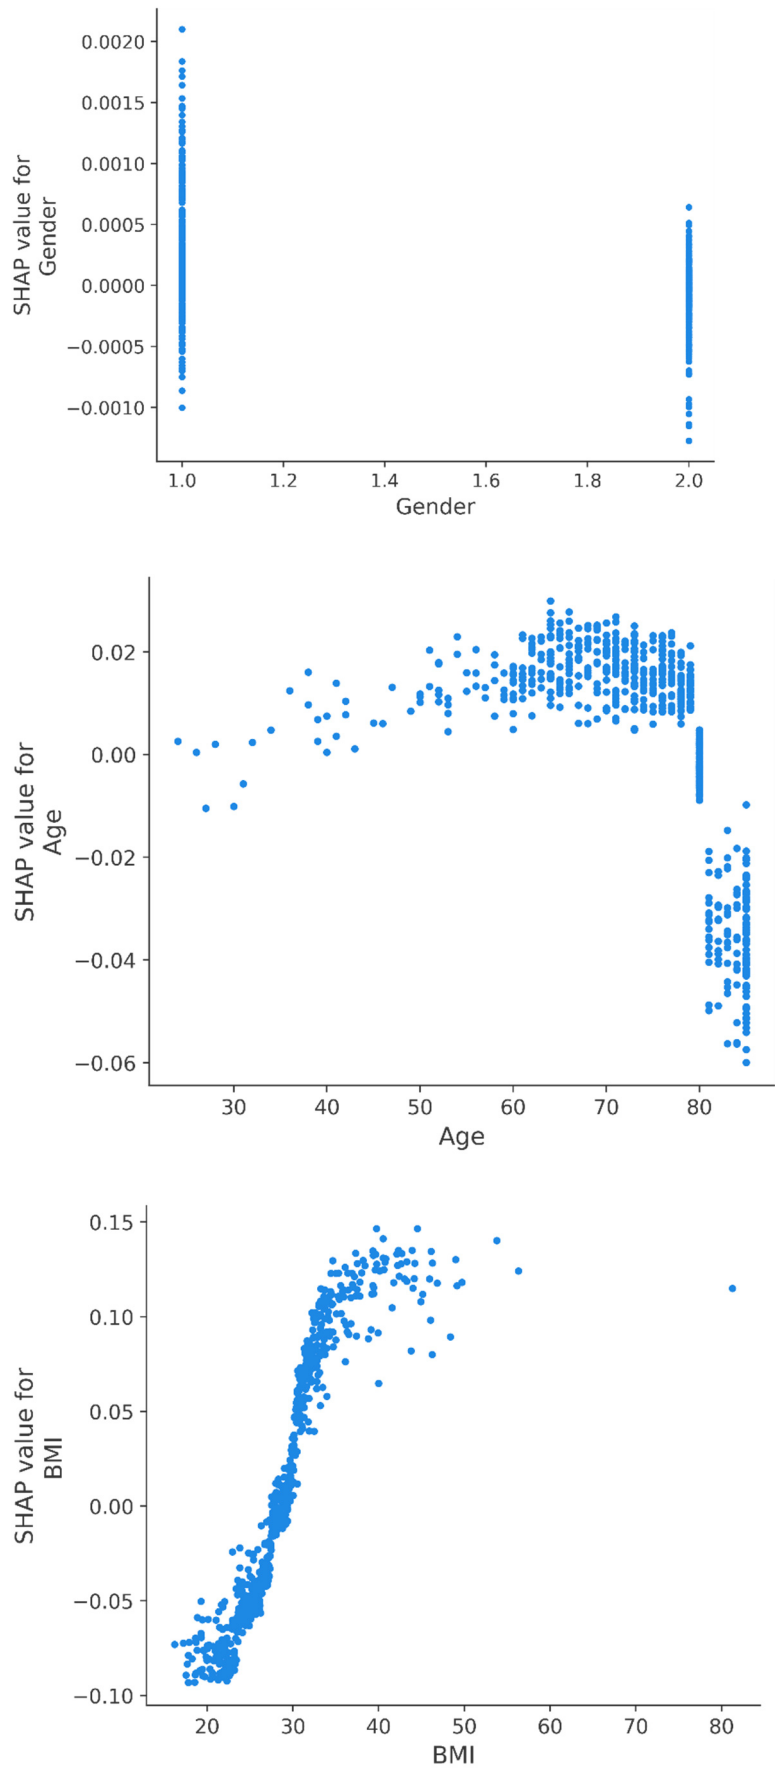



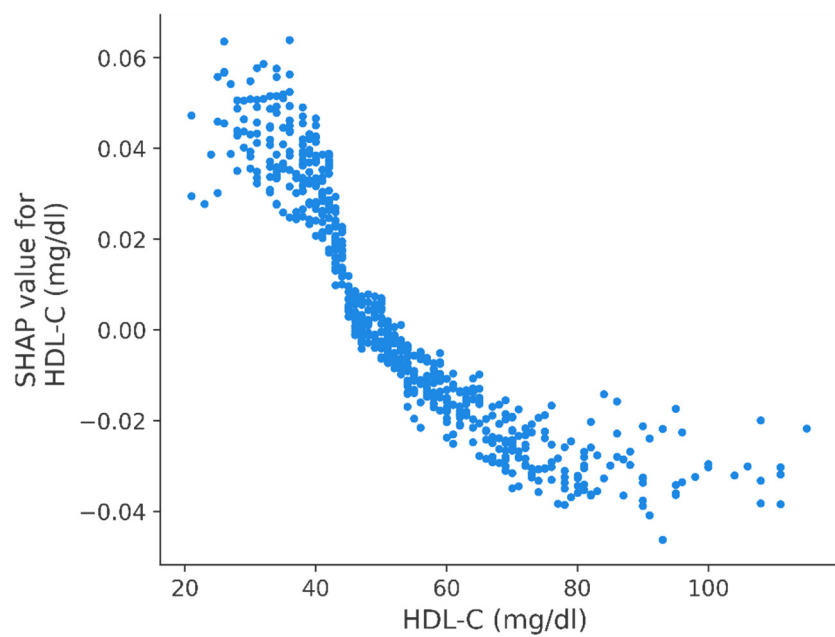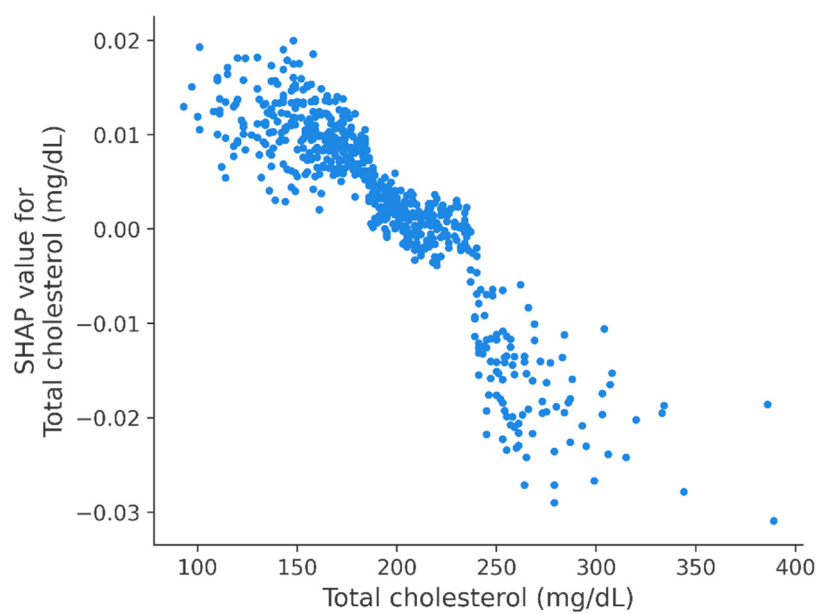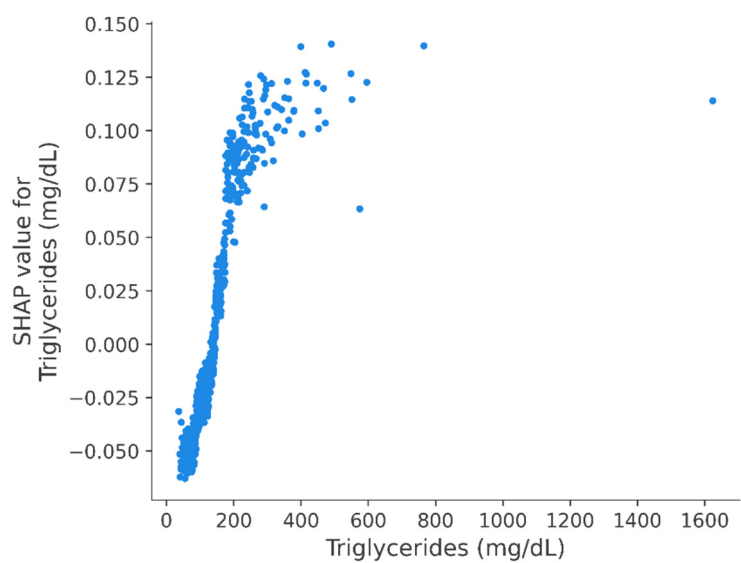

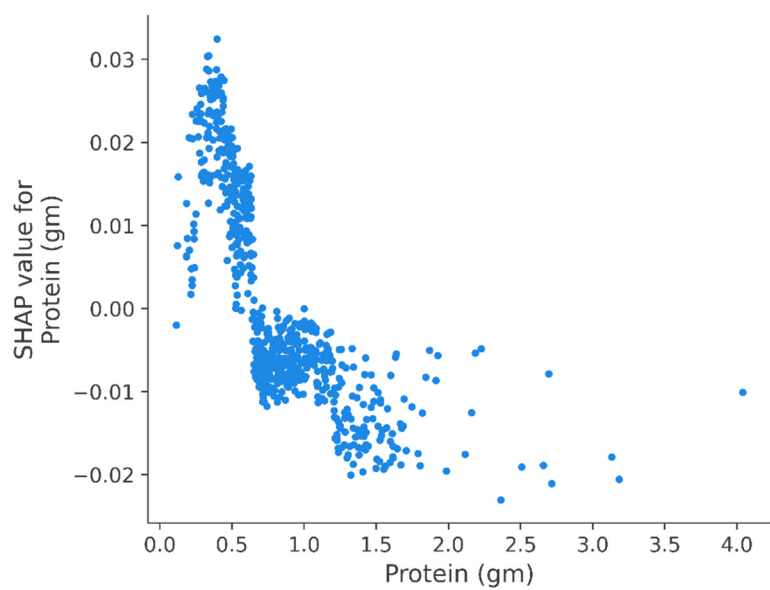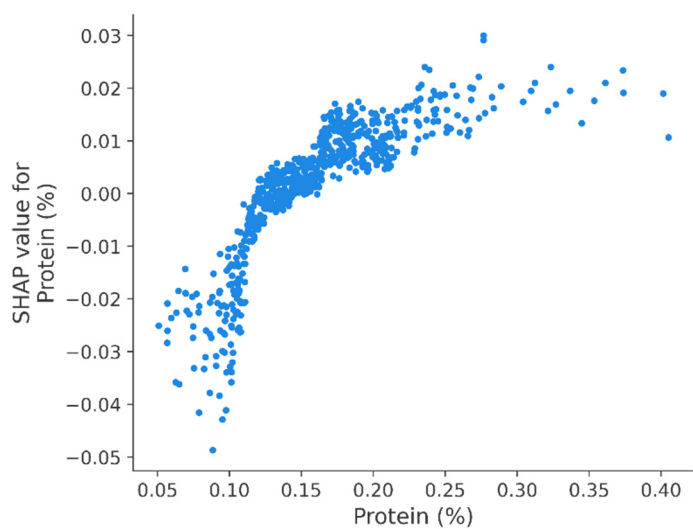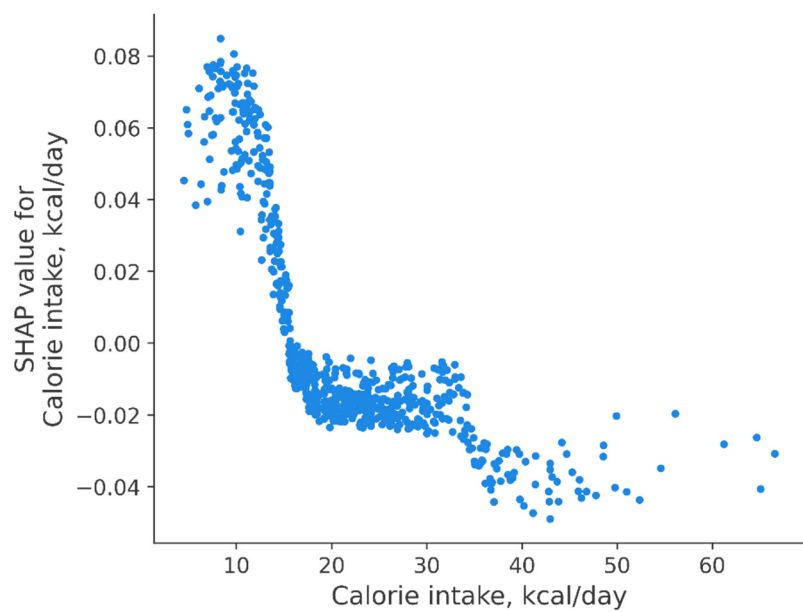

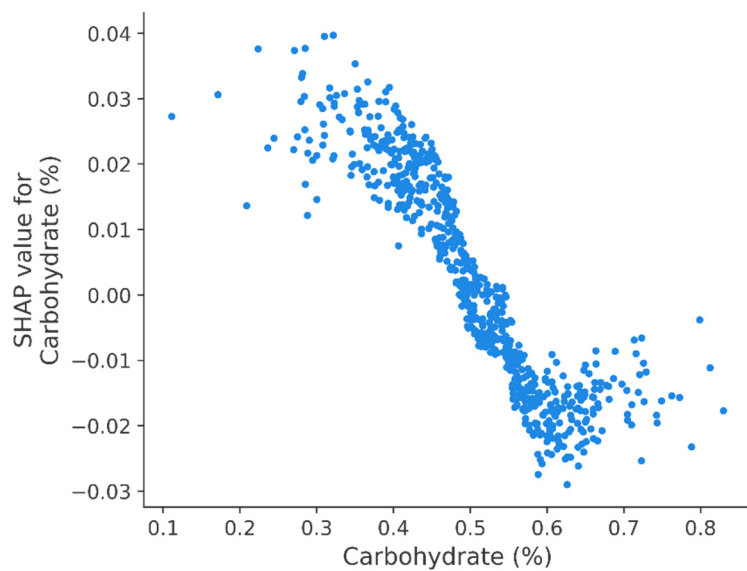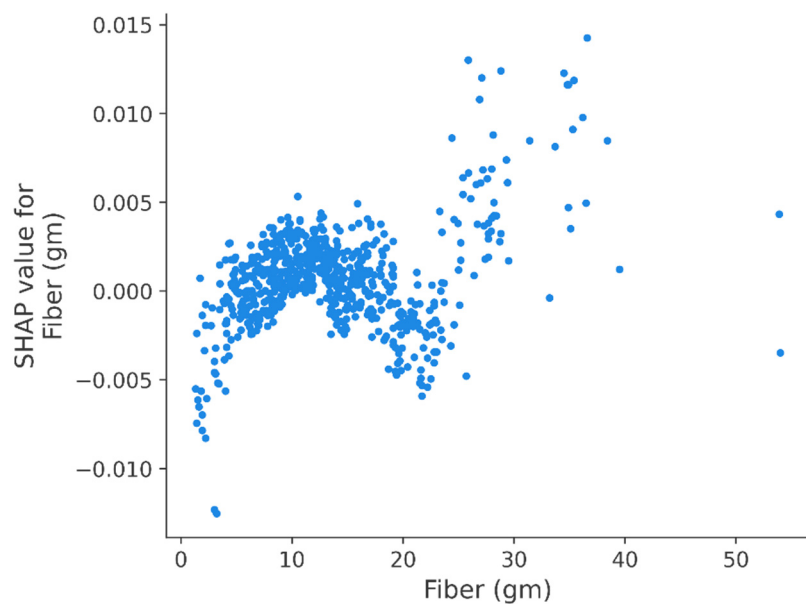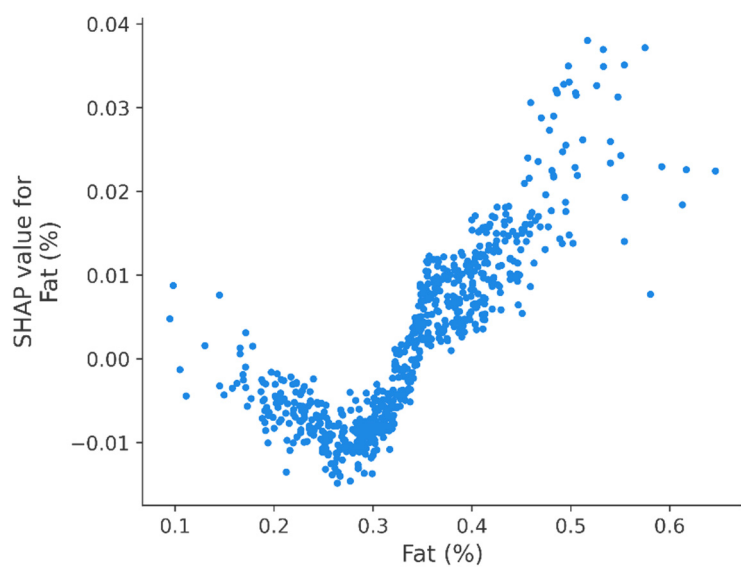

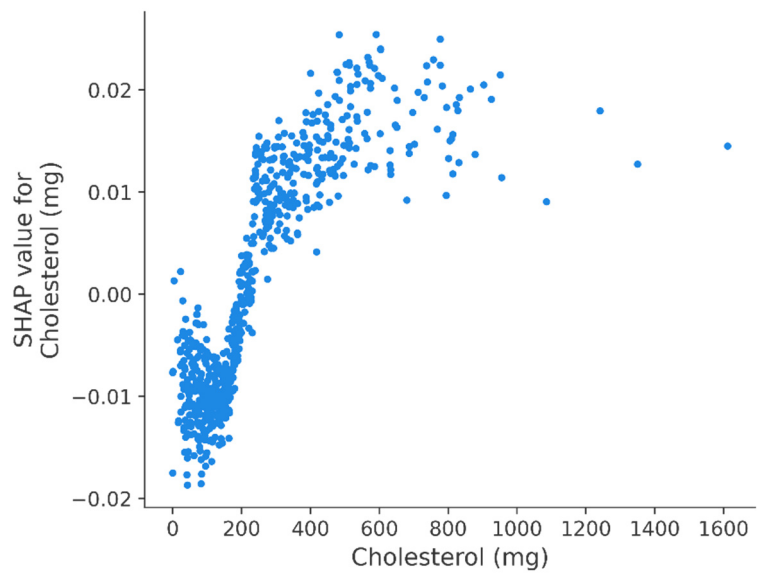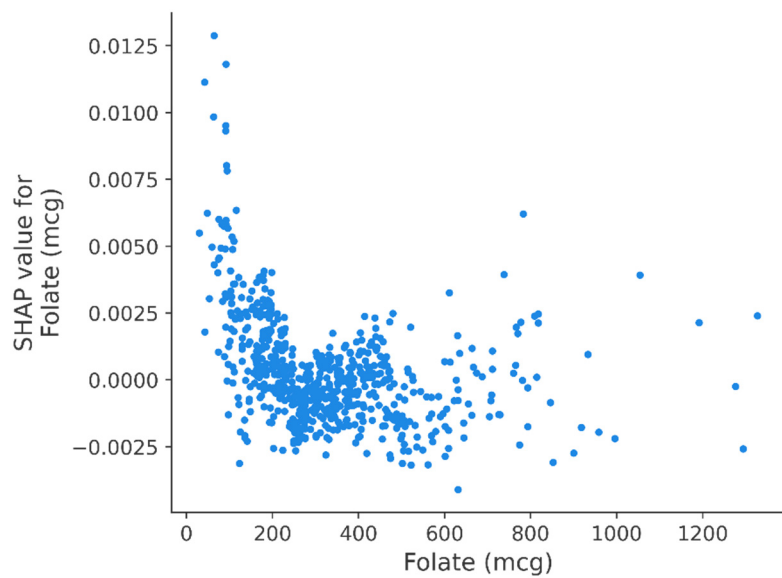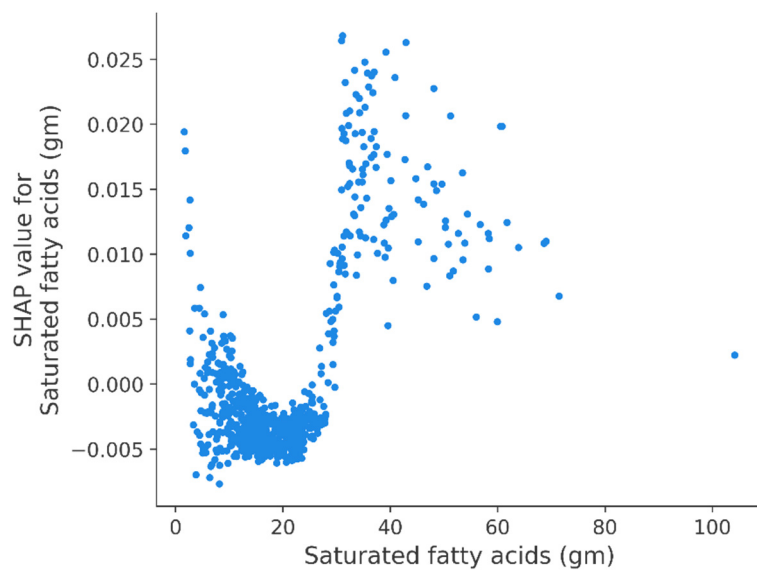

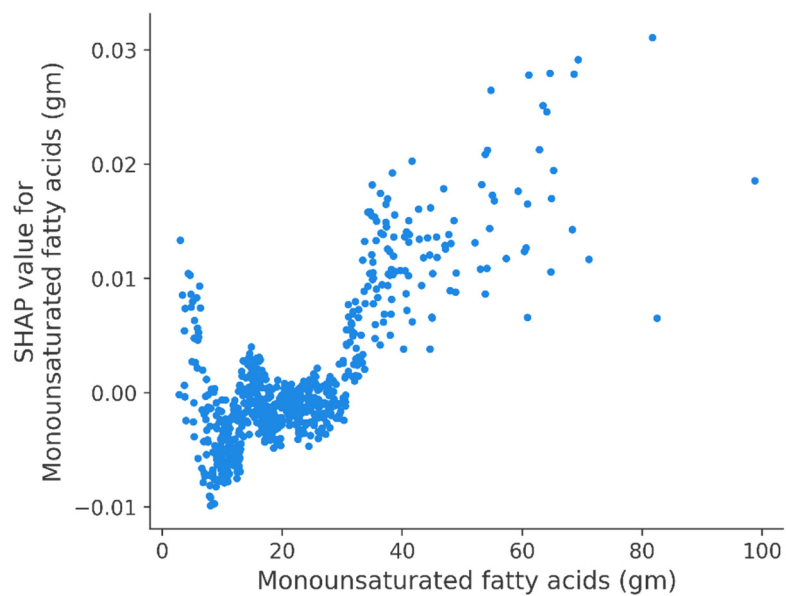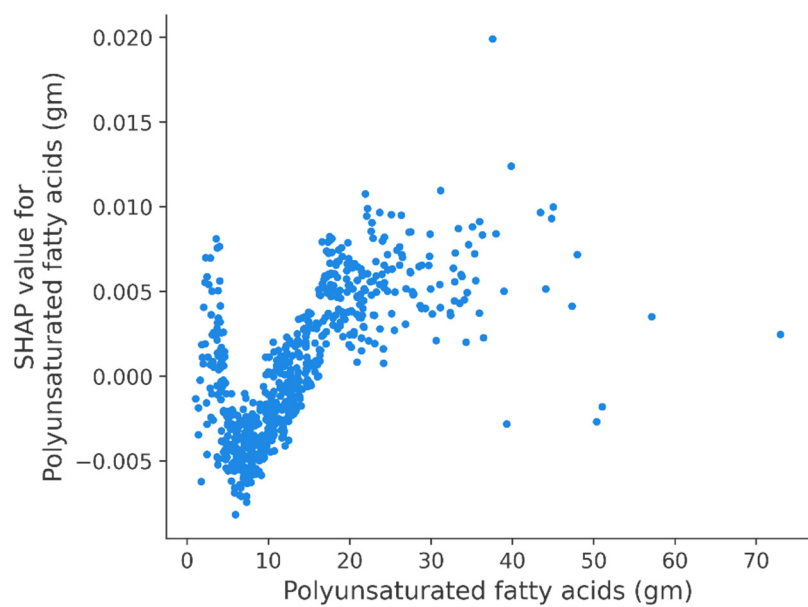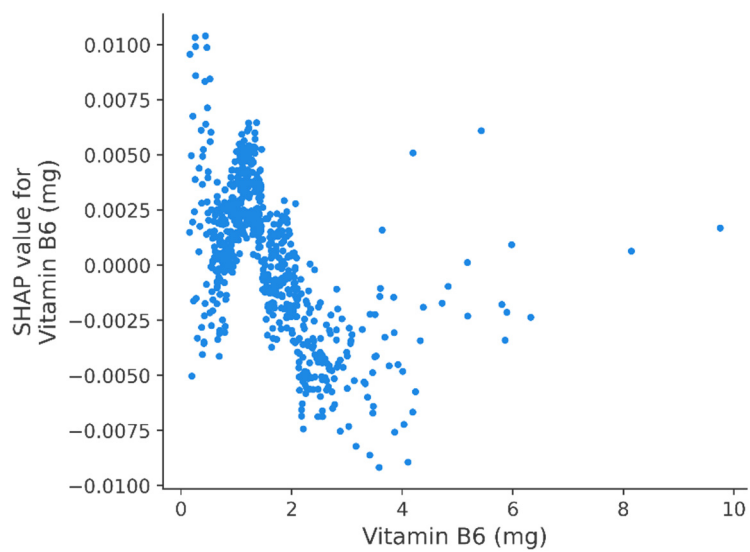

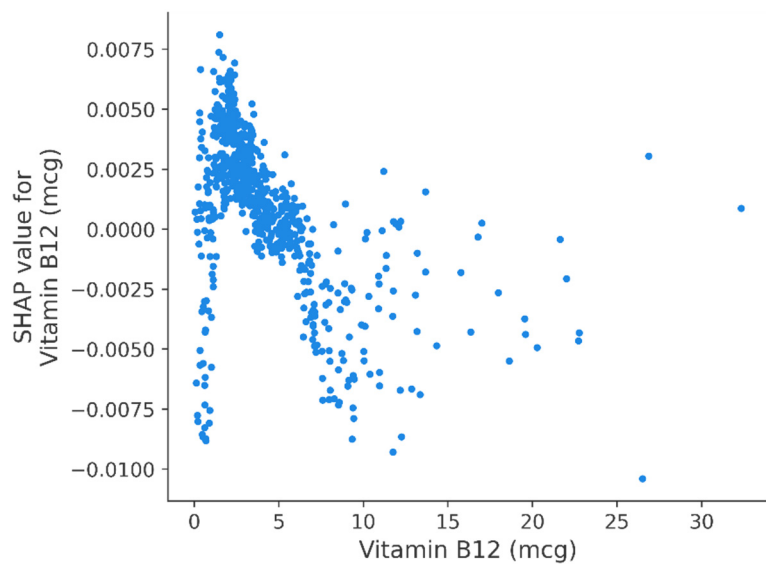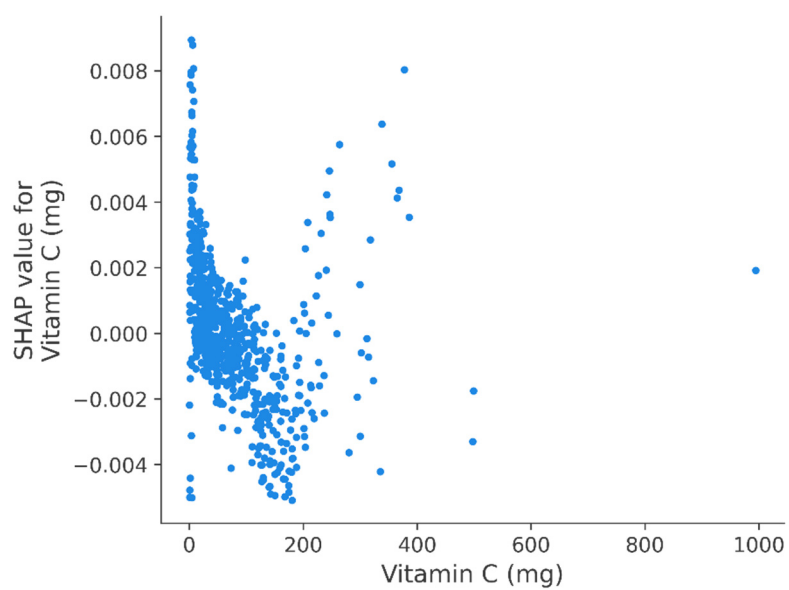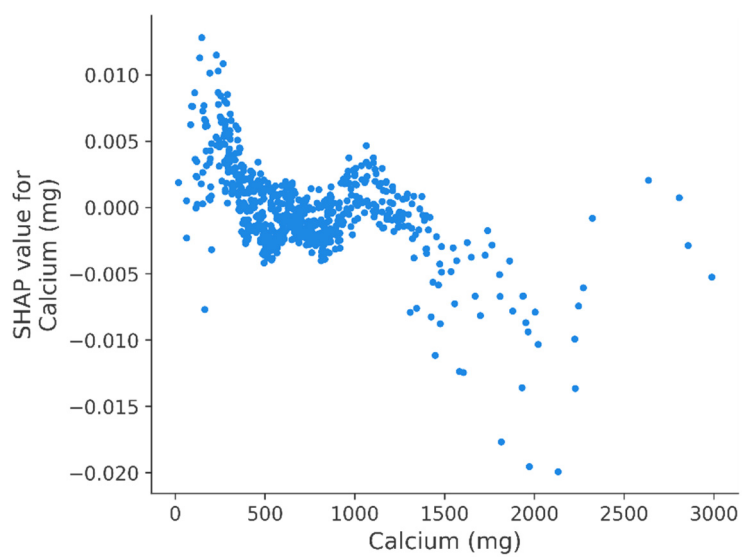

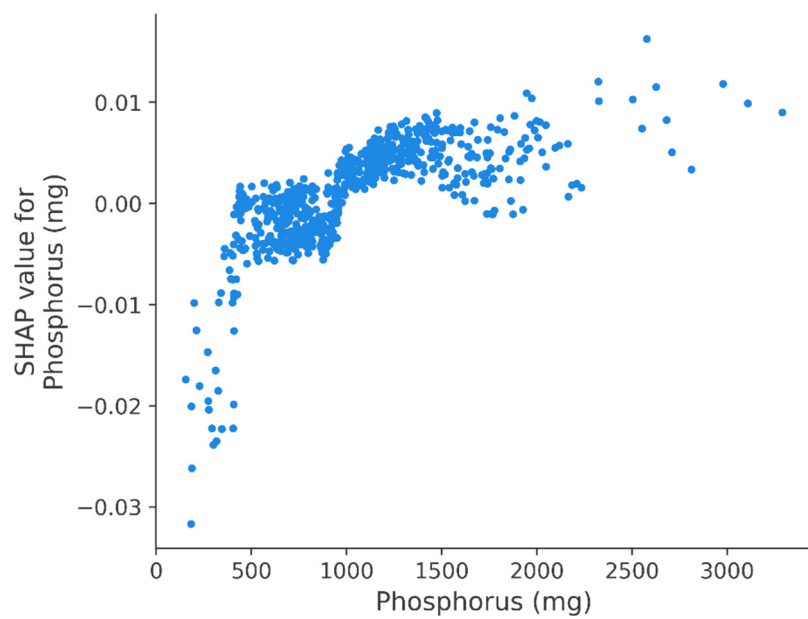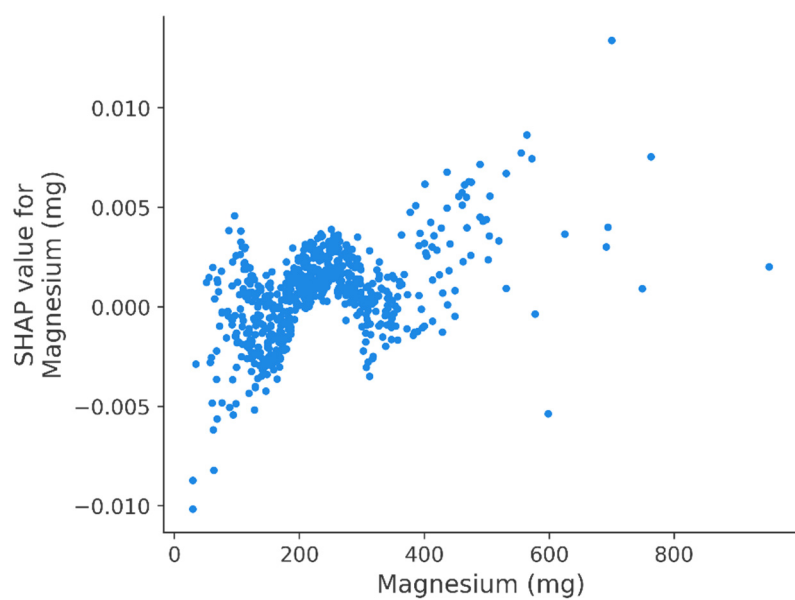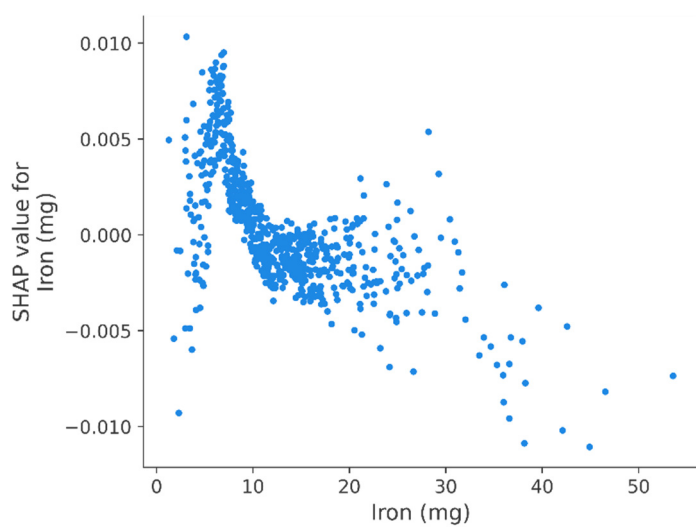

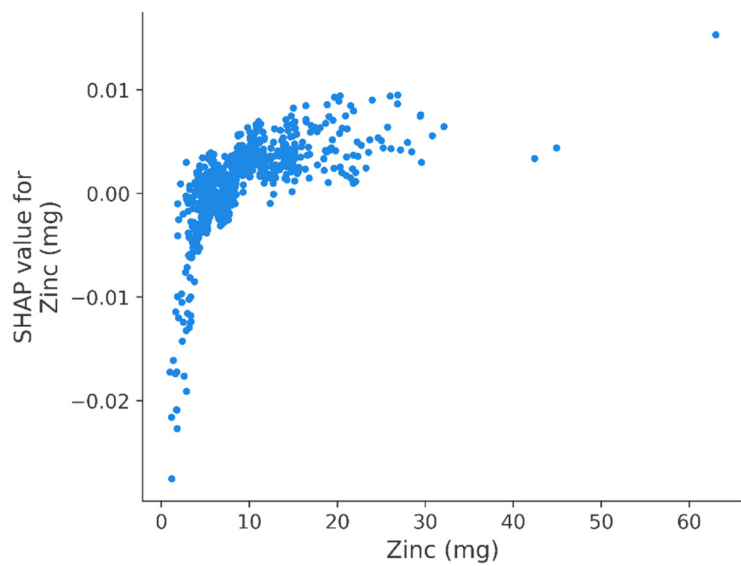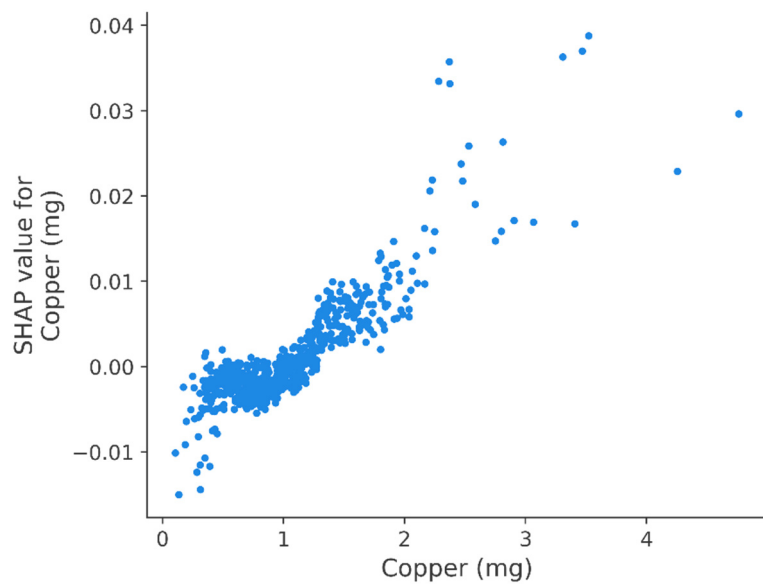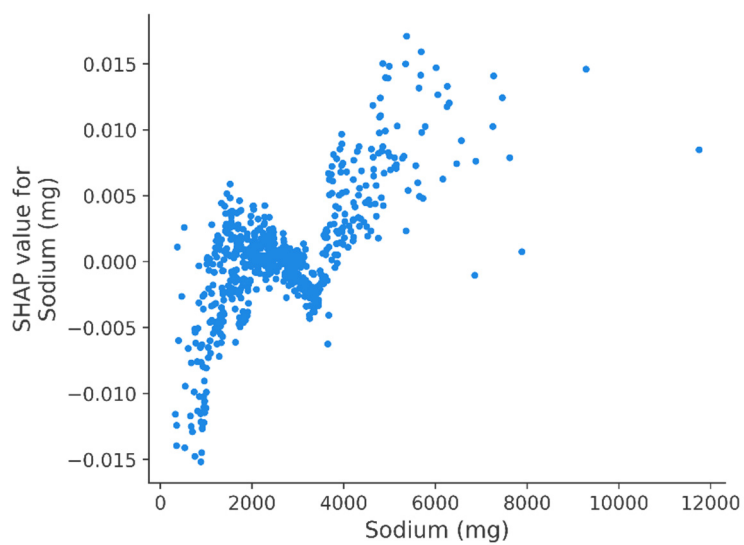



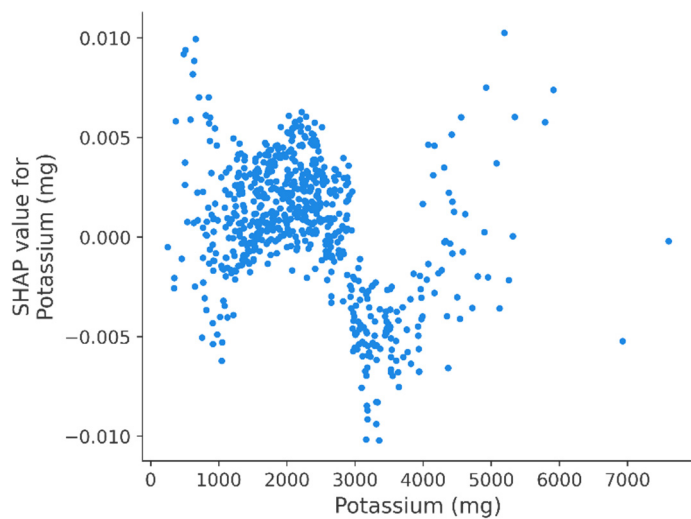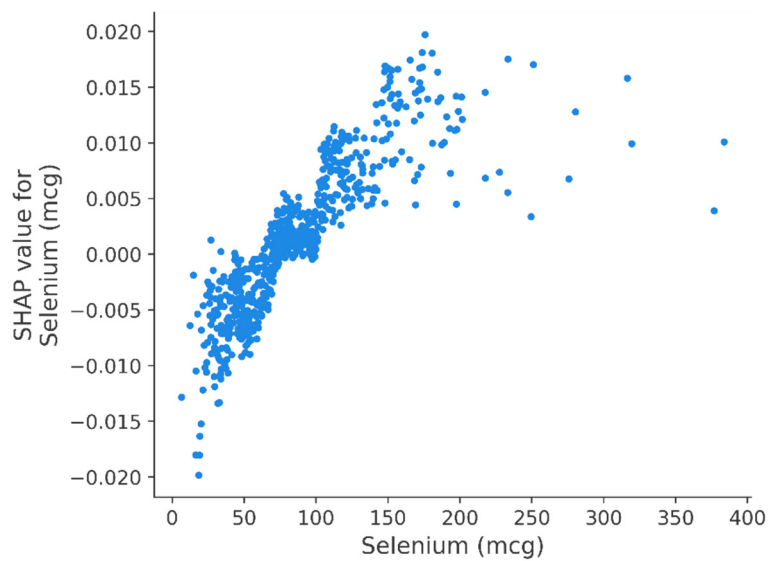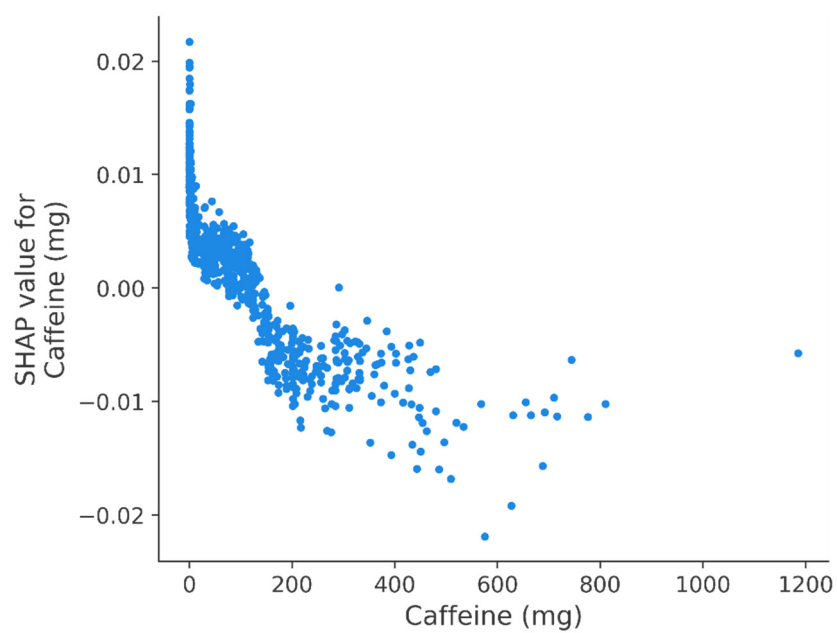

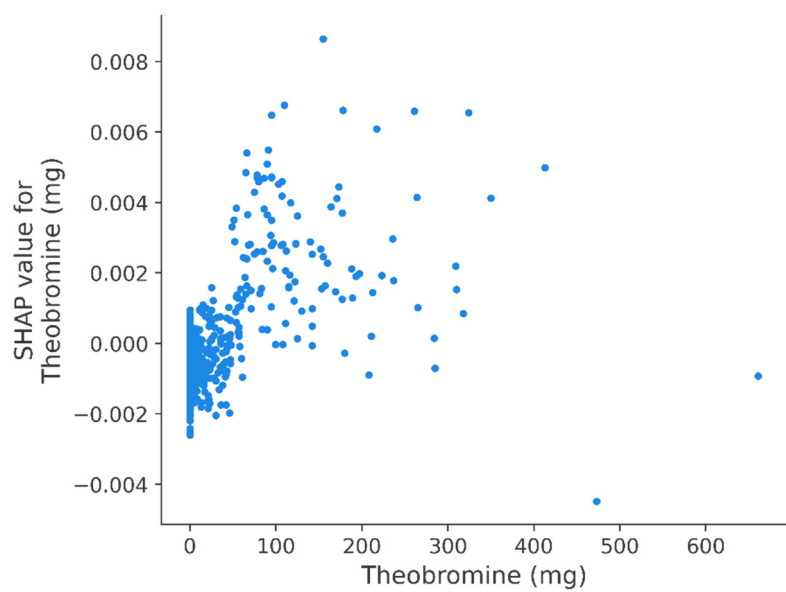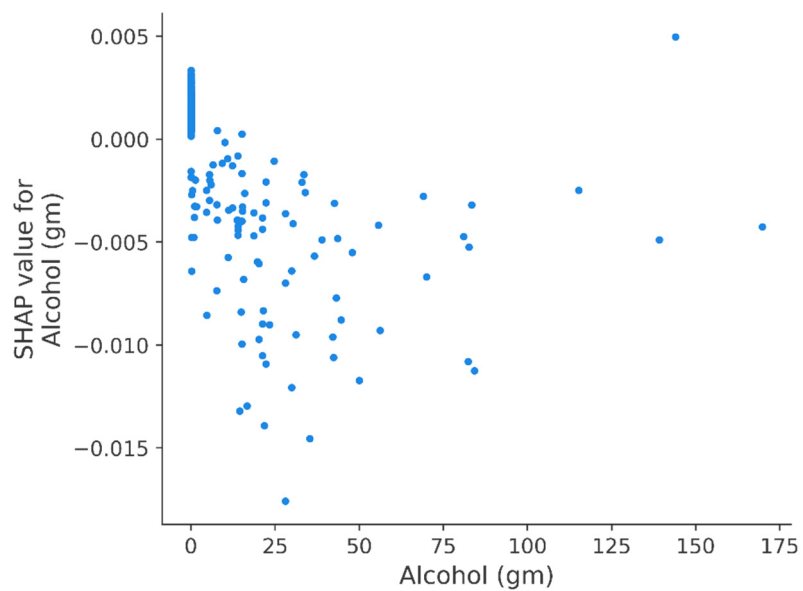

Supplement: s1 [file s1]
